# Supplementary material
Source: HighWire-hosted journal article supplement (http://cmajopen.ca/highwire/filestream/90035/field_highwire_adjunct_files/0/open-2022-0123-1-at.pdf)
Supplement: open-2022-0123-1-at.pdf [file open-2022-0123-1-at.pdf]

Appendix 1: Cohort creation

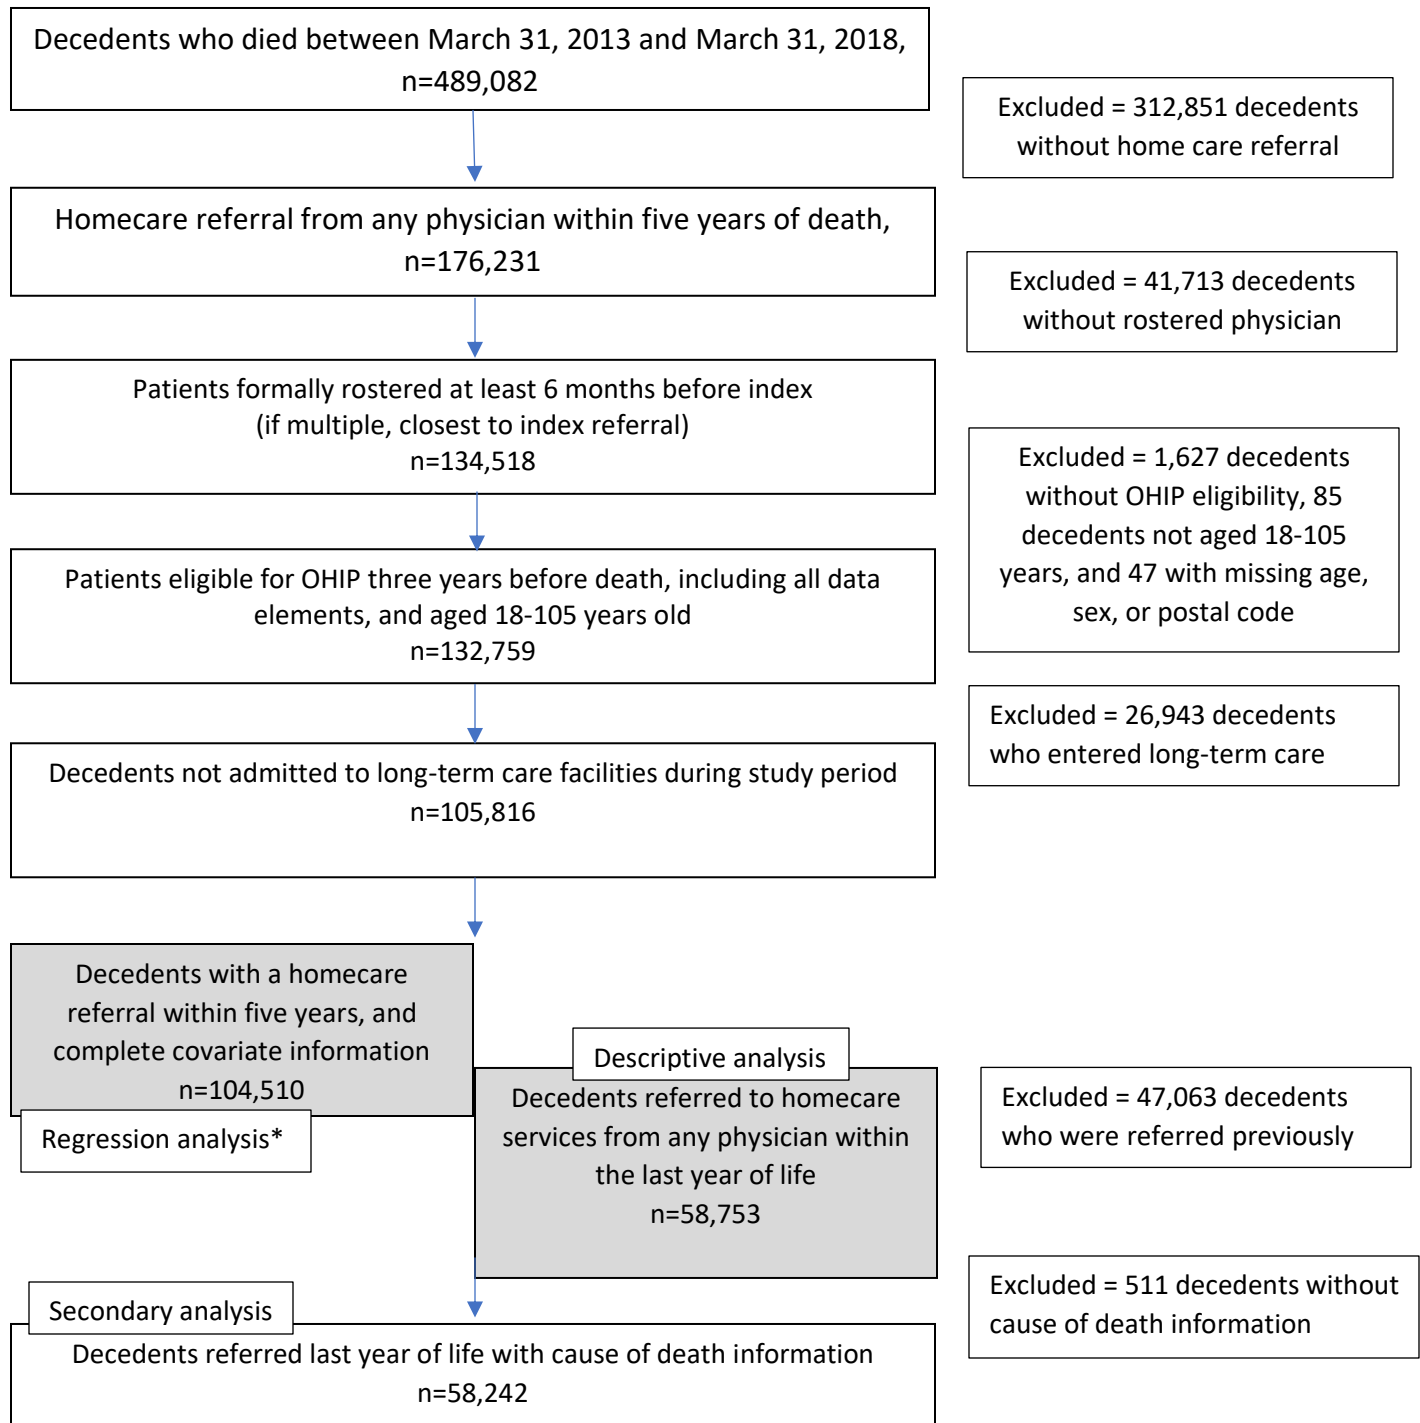

Supplementary Figure: Cohort creation for analysis based on the linked databases and exclusion criteria  
 Legend: OHIP= Ontario Health Insurance Plan, \*Controlled for referral in the last year of life
